# Supplementary material
Source: PubMed Central journal article supplement (PMC2682226)

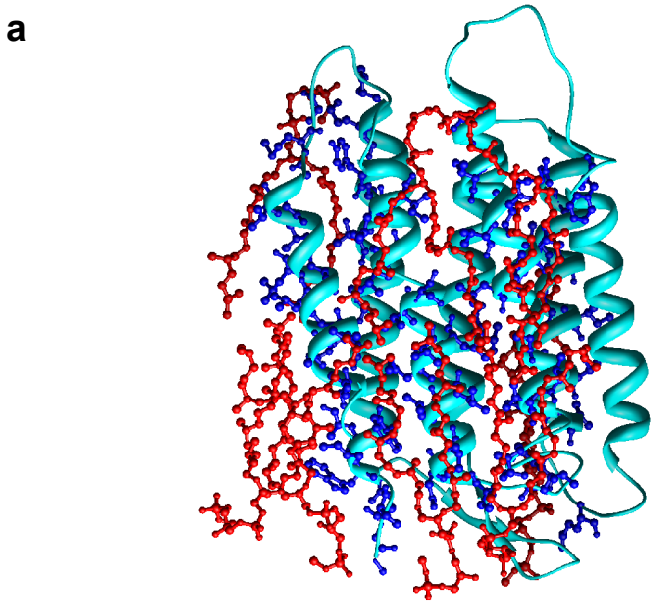

Electron Crystallography Structure

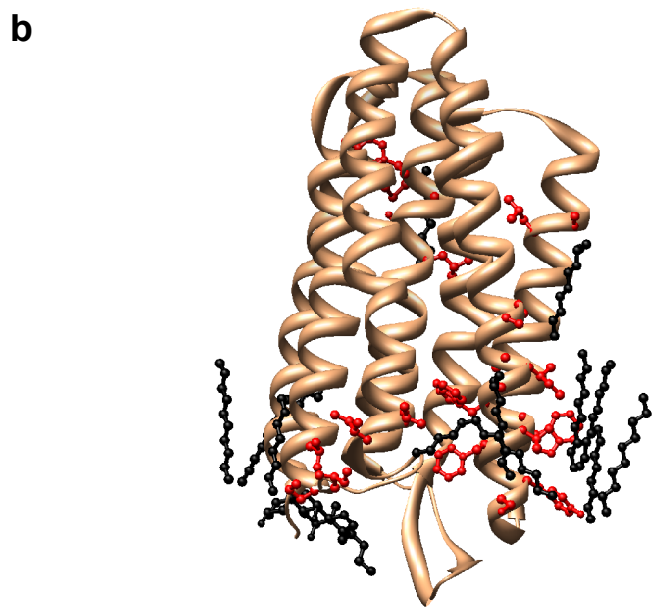

Bicelle Structure

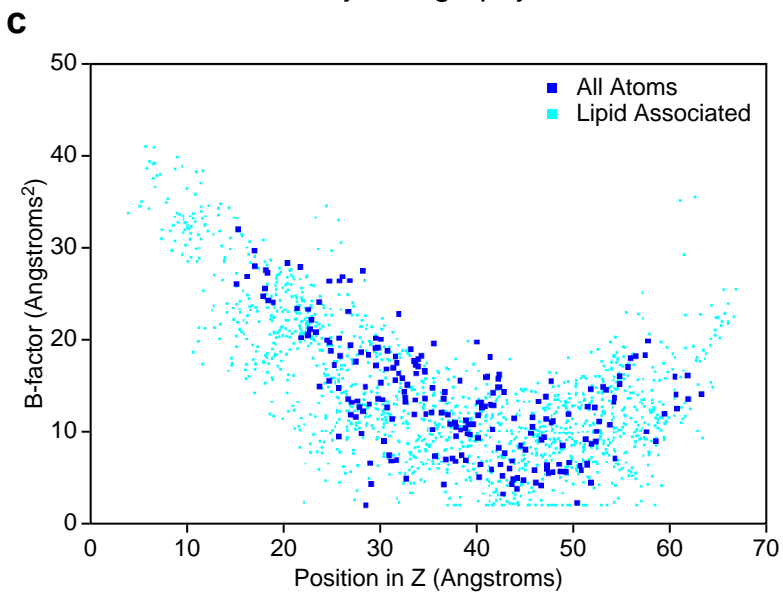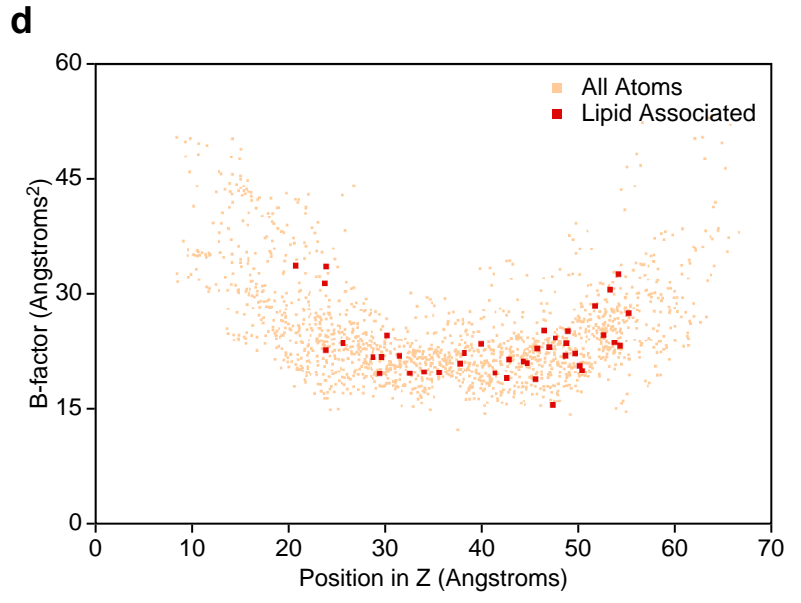

Hite et al. Supplementary Figure 1

Supplement: NIHMS113675-supplement-Figure_S1.pdf [file NIHMS113675-supplement-Figure_S1.pdf]
